# Supplementary material
Source: HighWire-hosted journal article supplement (https://ijgc.bmj.com/highwire/filestream/19154/field_highwire_adjunct_files/0/ijgc-2020-002302supp001_data_supplement.pdf)
Supplement: ijgc-2020-002302supp001_data_supplement.pdf [file ijgc-2020-002302supp001_data_supplement.pdf]

## Supplementary File

**Table S1.** Histologic outcomes according to triage test results (single and combined) among HPV-positive

| Triage test                       | Biopsies/ECB<br>n (%) | Normal<br>n (%) | CIN 1<br>n (%) | CIN 2<br>n (%) | CIN 3<br>n (%) | C. cancer<br>n (%) |
|-----------------------------------|-----------------------|-----------------|----------------|----------------|----------------|--------------------|
| VA                                |                       |                 |                |                |                |                    |
| Positive                          | 168 (58.7)            | 106 (63.1)      | 35 (20.8)      | 11 (6.6)       | 15 (8.9)       | 1 (0.6)            |
| Negative                          | 118 (41.3)            | 95 (80.5)       | 15 (12.7)      | 2 (1.7)        | 4 (3.4)        | 2 (1.7)            |
| Manual LBC                        |                       |                 |                |                |                |                    |
| Positive (≥ ASC-US)               | 51 (18.5)             | 15 (29.4)       | 8 (15.7)       | 8 (15.7)       | 17 (33.3)      | 3 (5.9)            |
| Negative                          | 225 (81.5)            | 176 (78.2)      | 42 (18.7)      | 5 (2.2)        | 2 (0.9)        | 0                  |
| Automated LBC                     |                       |                 |                |                |                |                    |
| Positive                          | 91 (36.0)             | 44 (48.4)       | 19 (20.9)      | 11 (12.1)      | 16 (17.6)      | 1 (1.1)            |
| Negative                          | 162 (64.0)            | 129 (79.6)      | 28 (17.3)      | 2 (1.2)        | 3 (1.9)        | 0                  |
| Genotyping                        |                       |                 |                |                |                |                    |
| Positive (HPV 16/18-45)           | 64 (22.4)             | 39 (60.9)       | 12 (18.6)      | 3 (4.7)        | 8 (12.5)       | 2 (3.1)            |
| Negative (HPV HR others)          | 222 (77.6)            | 162 (73.0)      | 38 (17.1)      | 10 (4.5)       | 11 (5.0)       | 1 (0.5)            |
| Genotyping & Reflex VA            |                       |                 |                |                |                |                    |
| Positive                          | 192 (67.1)            | 124 (64.6)      | 39 (20.3)      | 11 (5.7)       | 16 (8.3)       | 2 (1.0)            |
| Negative                          | 94 (32.9)             | 77 (81.9)       | 11 (11.7)      | 2 (2.1)        | 3 (3.2)        | 1 (1.1)            |
| Genotyping & Reflex Manual LBC    |                       |                 |                |                |                |                    |
| Positive                          | 96 (34.4)             | 49 (51.0)       | 17 (17.7)      | 9 (9.4)        | 18 (18.8)      | 3 (3.1)            |
| Negative                          | 183 (65.6)            | 145 (79.2)      | 33 (18.0)      | 4 (2.2)        | 1 (0.6)        | 0                  |
| Genotyping & Reflex Automated LBC |                       |                 |                |                |                |                    |
| Positive                          | 133 (50.6)            | 77 (58.9)       | 25 (18.8)      | 11 (8.3)       | 18 (13.5)      | 2 (1.5)            |
| Negative                          | 130 (49.4)            | 103 (79.2)      | 24 (18.5)      | 2 (1.5)        | 1 (0.8)        | 0                  |

Abbreviations: VA= Visual Assessment; LBC= Liquid-based Cytology; CIN1= cervical intraepithelial neoplasia grade 1; CIN2= cervical intraepithelial neoplasia grade 2; CIN3= cervical intraepithelial neoplasia grade 3; C. cancer= Cervical cancer; ECB= endocervical brushing; HPV= Human papillomavirus; n= number
